# Supplementary material
Source: publisher figshare collection journal article supplement (https://aacr.figshare.com/articles/dataset/_/23905223)
Supplement: Supplementary file 1 [file 41911406]

**Supplemental Table 1.** List of GEP70 genes located on chromosome 1 and their cytoband location.

| <b>Cytoband</b> | <b>Affymetrix probe set ID</b> | <b>Gene symbol</b> |
|-----------------|--------------------------------|--------------------|
| <b>1p11</b>     | 225834_at                      | <i>MGC57827</i>    |
| <b>1p13</b>     | 227278_at                      | <i>TAF13</i>       |
| <b>1p13.1</b>   | 212435_at                      | <i>TRIM33</i>      |
| <b>1p13.2</b>   | 200850_s_at                    | <i>AHCYL1</i>      |
| <b>1p13.3</b>   | 213628_at                      | <i>MCLC</i>        |
| <b>1p13.3</b>   | 222495_at                      | <i>AD-020</i>      |
| <b>1p22</b>     | 209717_at                      | <i>EVI5</i>        |
| <b>1p22</b>     | 218924_s_at                    | <i>CTBS</i>        |
| <b>1p22.1</b>   | 1554736_at                     | <i>PARG1</i>       |
| <b>1p34</b>     | 202838_at                      | <i>FUCA1</i>       |
| <b>1p36.13</b>  | 201231_s_at                    | <i>ENO1</i>        |
| <b>1p36.33</b>  | 213607_x_at                    | <i>FLJ13052</i>    |
| <b>1q21.2</b>   | 201897_s_at                    | <i>CKS1B</i>       |
| <b>1q21.2</b>   | 210460_s_at                    | <i>PSMD4</i>       |
| <b>1q22</b>     | 206513_at                      | <i>AIM2</i>        |
| <b>1q22</b>     | 206332_s_at                    | <i>IFI16</i>       |
| <b>1q23.3</b>   | 200916_at                      | <i>TAGLN2</i>      |
| <b>1q31.3</b>   | 219918_s_at                    | <i>ASPM</i>        |
| <b>1q32.1</b>   | 206364_at                      | <i>KIF14</i>       |
| <b>1q43</b>     | 1565951_s_at                   | <i>OPN3</i>        |
| <b>1q43</b>     | 242488_at                      | Unknown            |
